# Supplementary material
Source: publisher figshare collection journal article supplement (https://gsapubs.figshare.com/ndownloader/files/23316242)

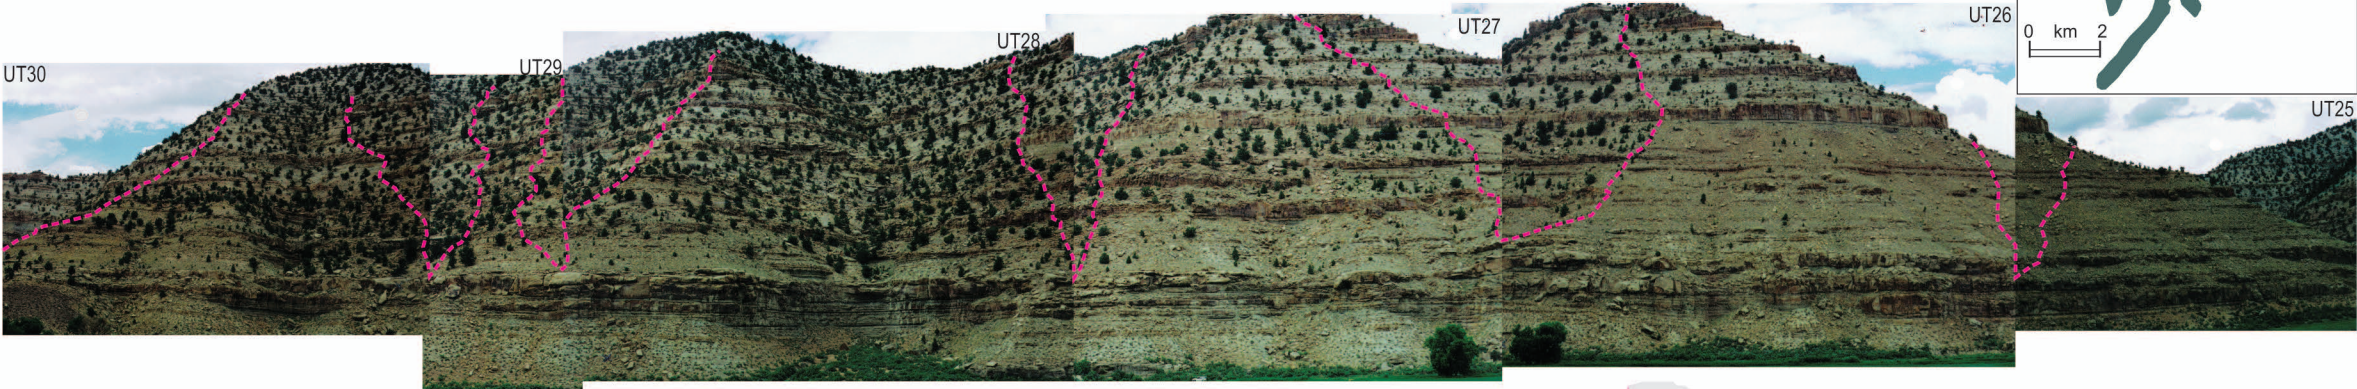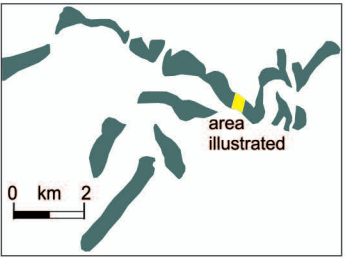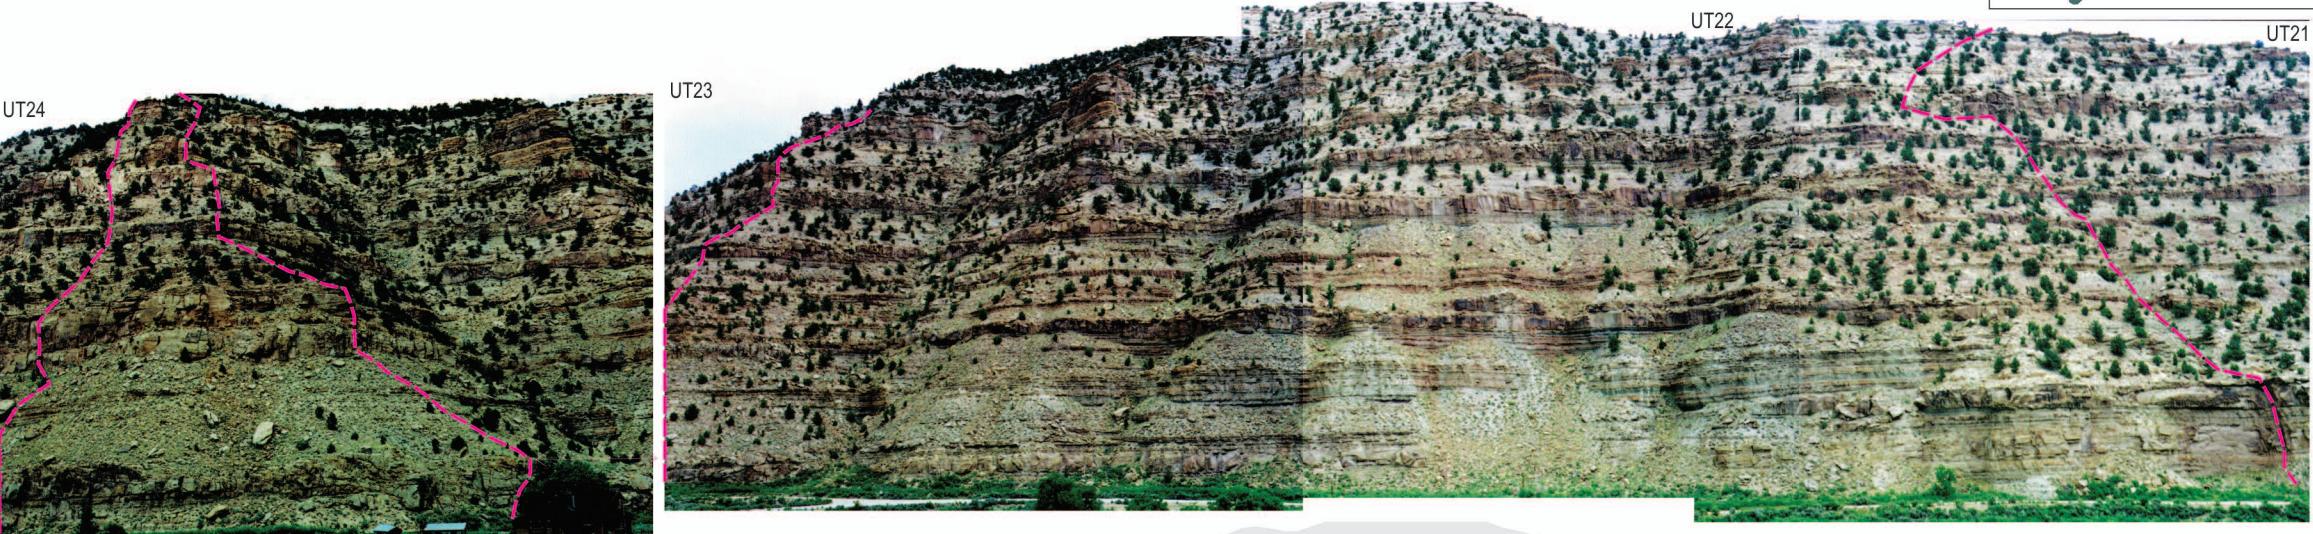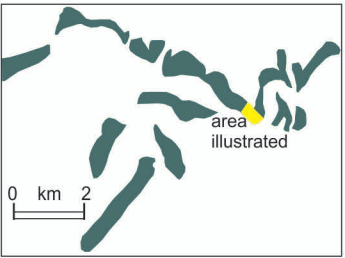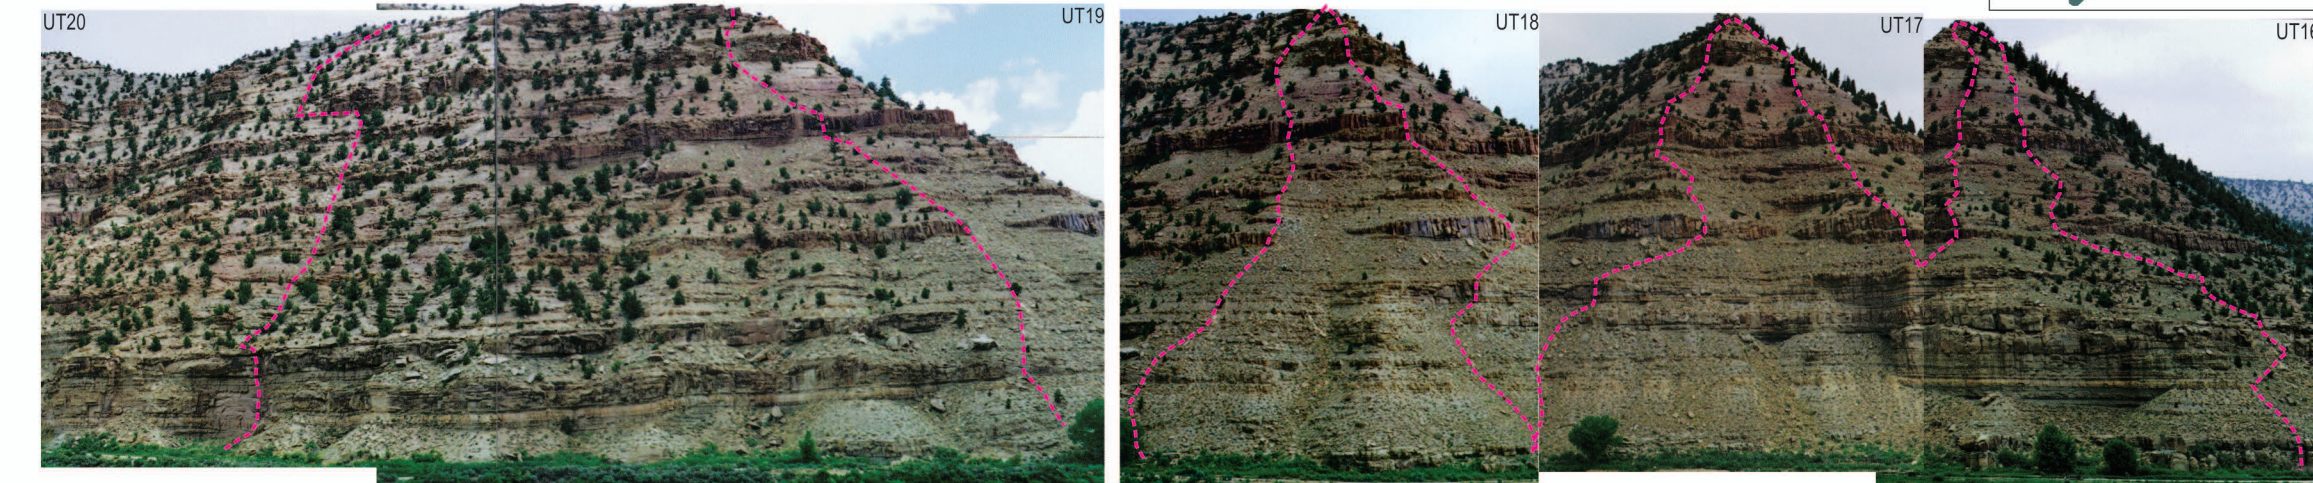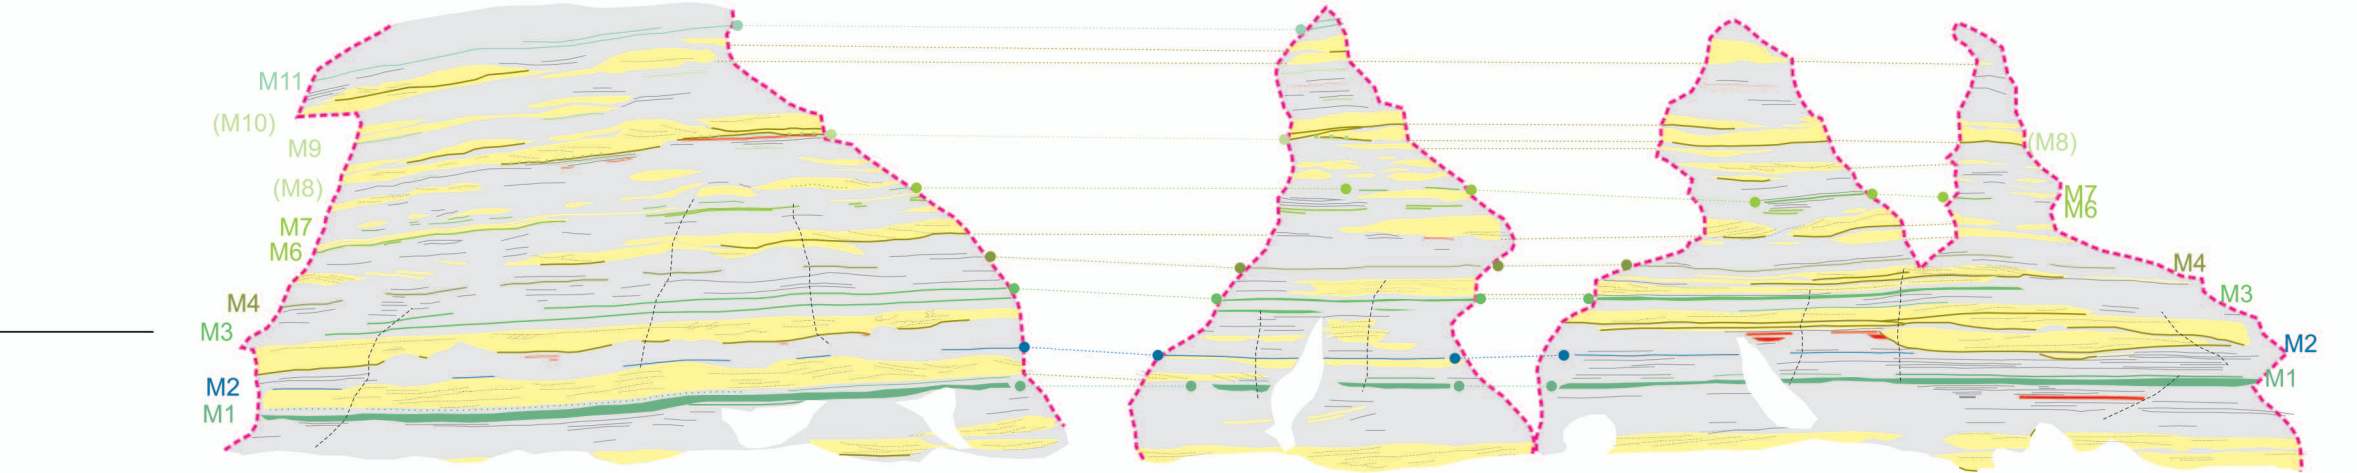



**PLATE DR2:** GSA Data Repository Item 2019211 accompanies Keighley, D., Spinnangr, Ø., Howell, J., and Flint, S., 2019, Interpretation of mouth-bar and related lacustrine and fluvial sand bodies from the middle Green River Formation (Eocene), southern Uinta Basin, Utah, *in* Starratt, S.W., and Rosen, M.R., eds., From Saline to Freshwater: The Diversity of Western Lakes in Space and Time: Geological Society of America Special Paper 536, [https://doi.org/10.1130/2019.2536\(15\)](https://doi.org/10.1130/2019.2536(15)).

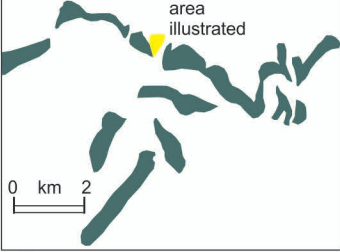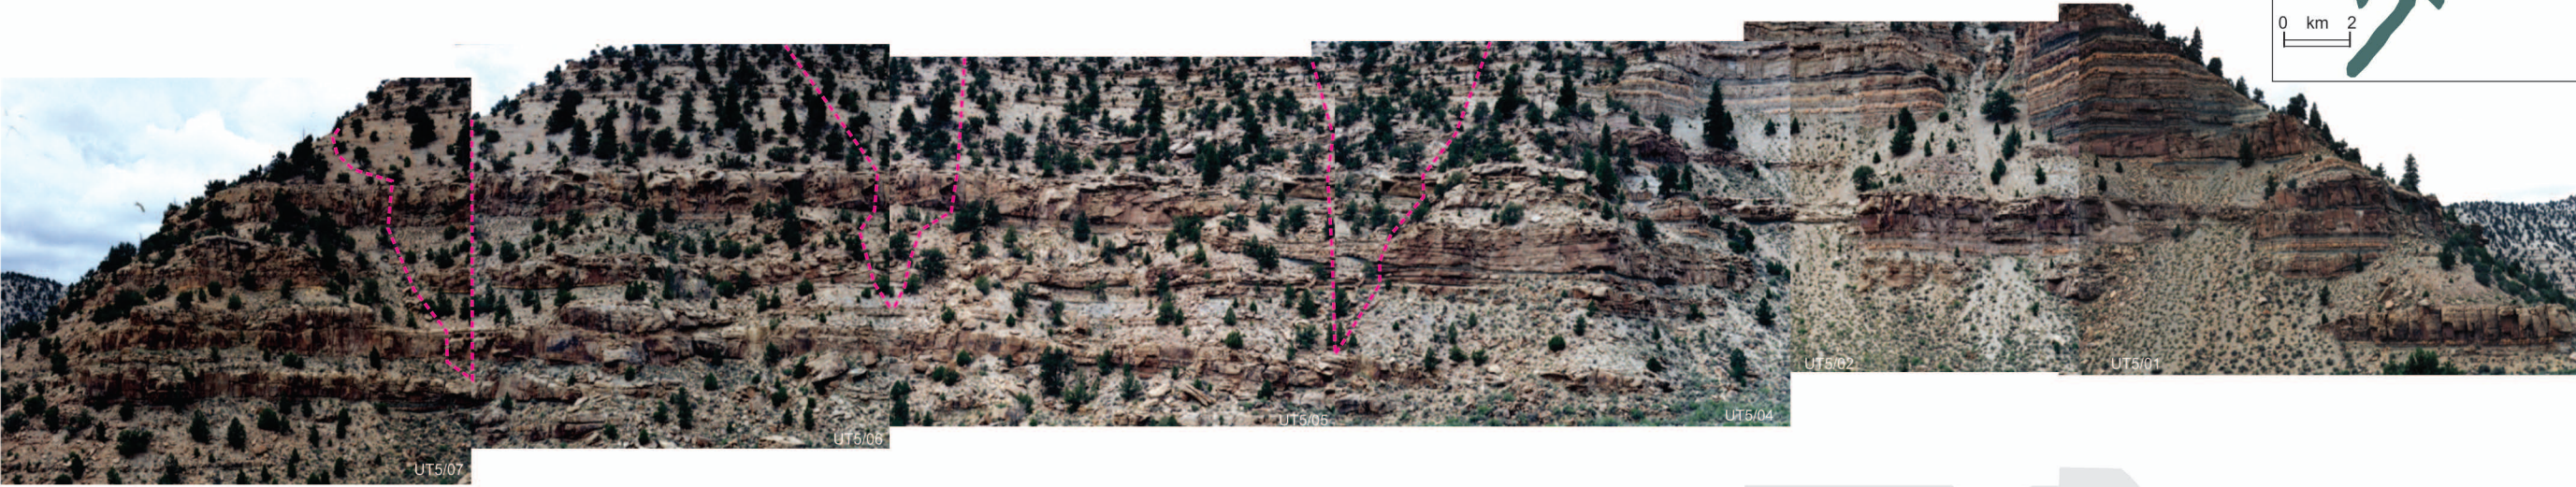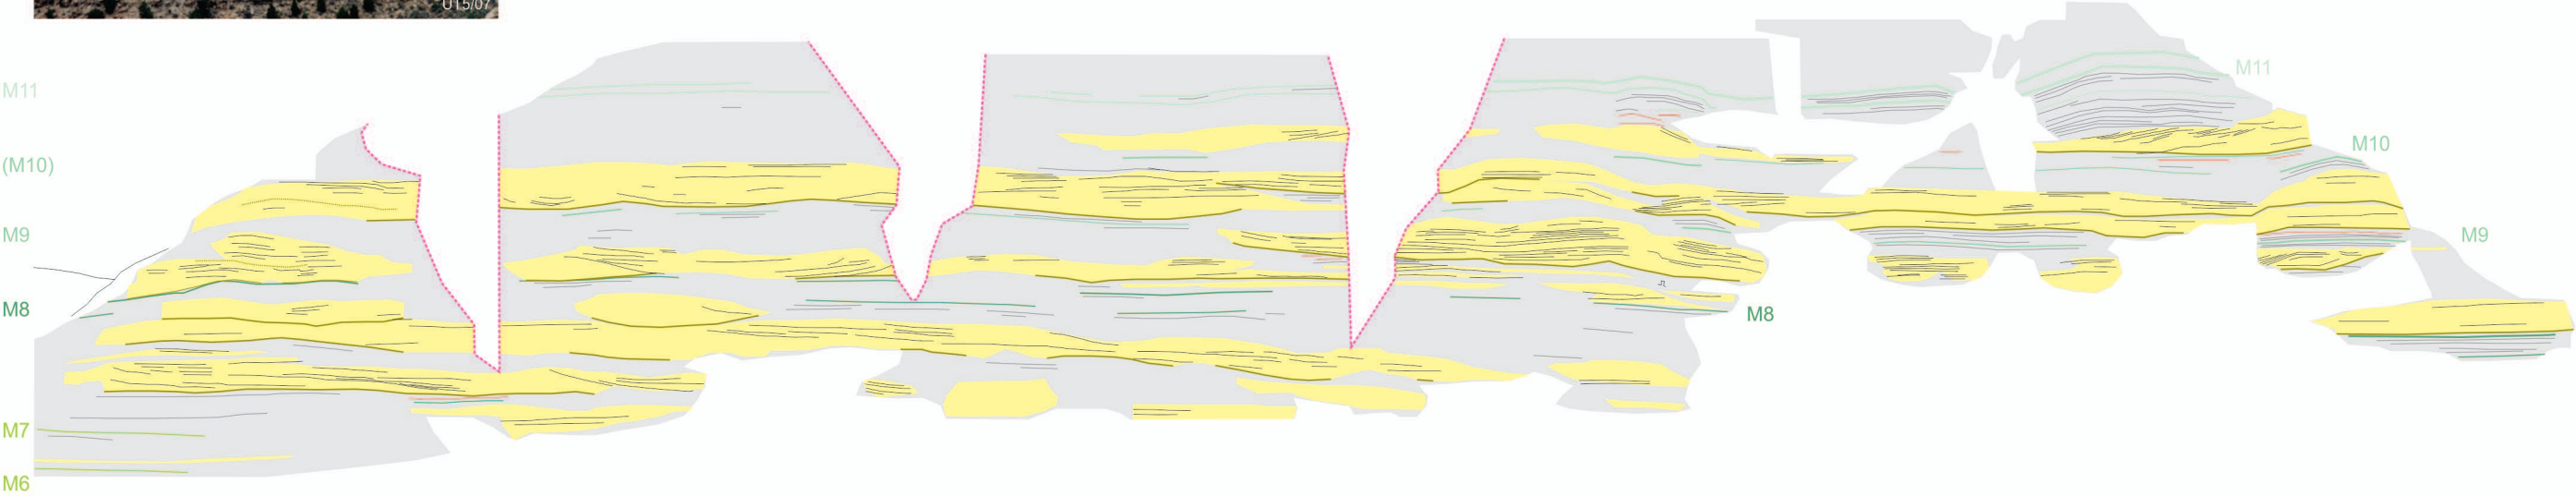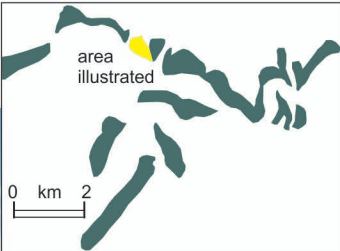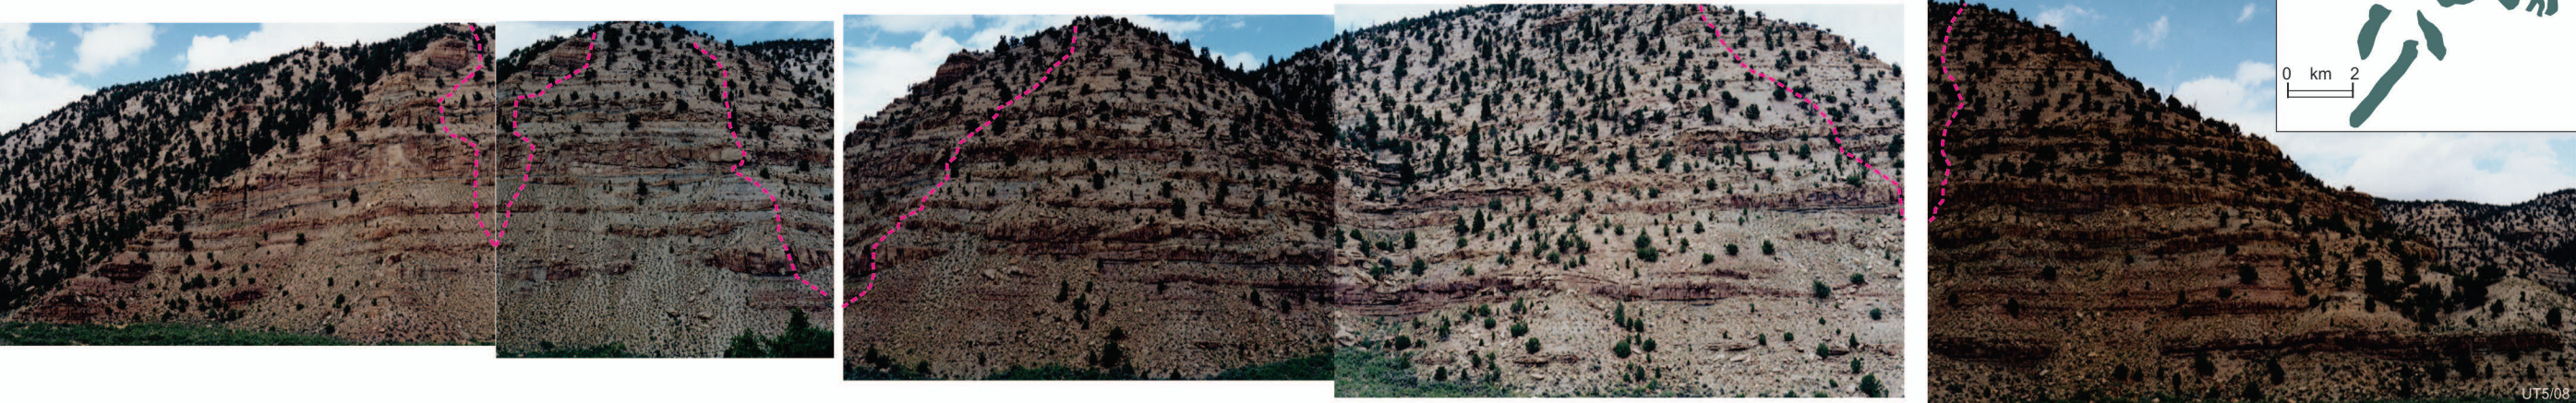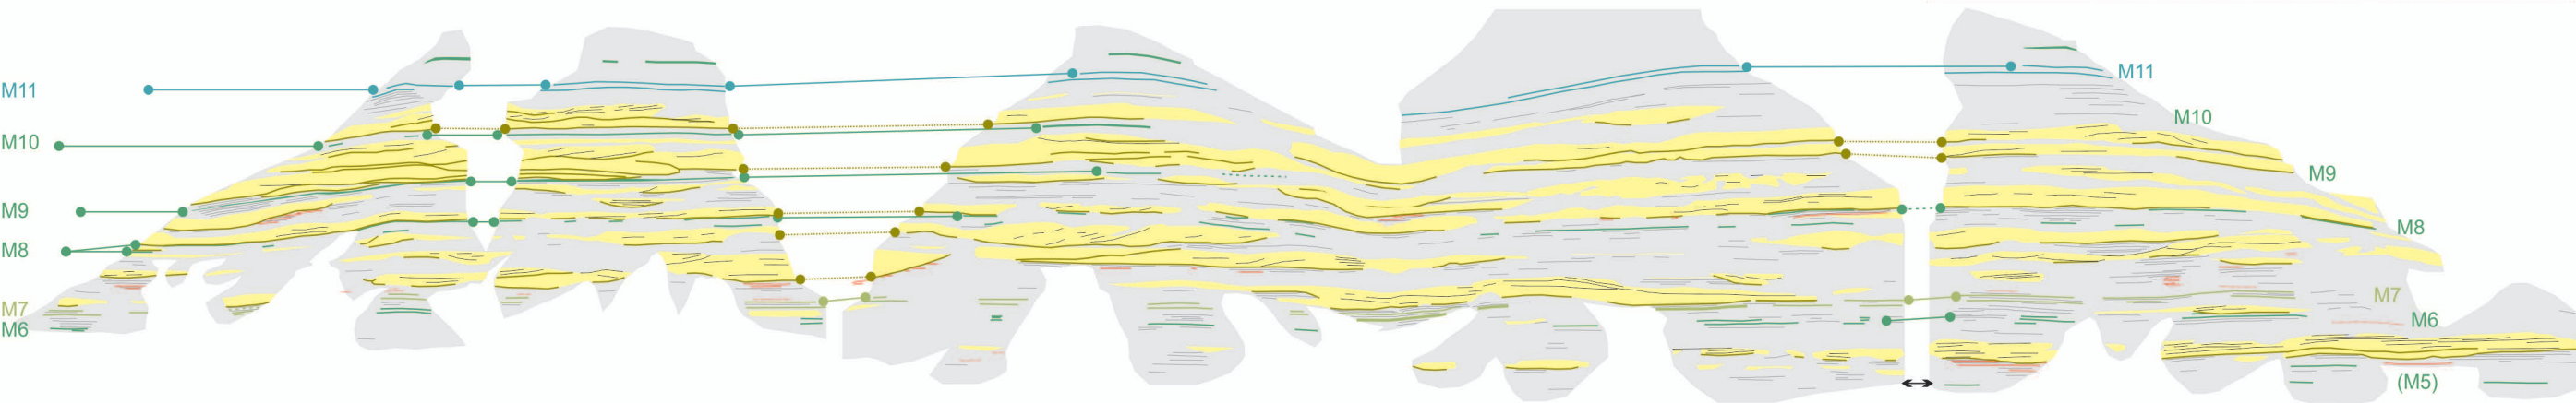

Supplement: Supplementary file 1 [file 23316242]
